# Supplementary material for: Metal‐Specific Biomaterial Accumulation in Human Peri‐Implant Bone and Bone Marrow
Source: PubMed Central journal article supplement (PMC7578891; doi:10.1002/advs.202000412), 2020-08-03
Supplement: ADVS-7-2000412-s001.pdf [file ADVS-7-2000412-s001.pdf]

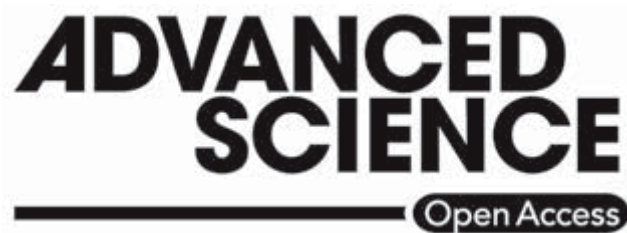

## Supporting Information

for *Adv. Sci.*, DOI: 10.1002/adv.202000412

### Metal-Specific Biomaterial Accumulation in Human Peri-Implant Bone and Bone Marrow

*Janosch Schoon, Bernhard Hesse, Anastasia Rakow,  
Melanie J. Ort, Adrien Lagrange, Dorit Jacobi,  
Annika Winter, Katrin Huesker, Simon Reinke, Marine Cotte,  
Remi Tucoulou, Uwe Marx, Carsten Perka,\* Georg N. Duda,\*  
and Sven Geissler*

## Supporting Information

### **Metal-specific biomaterial accumulation in human peri-implant bone and bone marrow**

*Janosch Schoon, Bernhard Hesse, Anastasia Rakow, Melanie J. Ort, Adrien Lagrange, Dorit Jacobi, Annika Winter, Katrin Huesker, Simon Reinke, Marine Cotte, Remi Tucoulou, Uwe Marx, Carsten Perka\*, Georg N. Duda\*\*, Sven Geißler*

\*carsten.perka@charite.de

\*\*georg.duda@charite.de

---

**Table S1.** Baseline patient and implant data

| patient   | age | sex | revised implant        | indication for surgery                                                              | surgical treatment                                                                                  | ipsilateral implant status                                                                                                | years since latest ipsilateral surgery | implant status contralateral joint |
|-----------|-----|-----|------------------------|-------------------------------------------------------------------------------------|-----------------------------------------------------------------------------------------------------|---------------------------------------------------------------------------------------------------------------------------|----------------------------------------|------------------------------------|
| control 1 | 70  | w   | native                 | knee osteoarthritis                                                                 | primary TKA                                                                                         | -                                                                                                                         | -                                      | TKA                                |
| control 2 | 48  | w   | native                 | osteoarthritis secondary to hip dysplasia                                           | primary THA                                                                                         | -                                                                                                                         | -                                      | native                             |
| control 3 | 79  | w   | native                 | knee osteoarthritis                                                                 | primary TKA                                                                                         | -                                                                                                                         | -                                      | native                             |
| control 4 | 71  | w   | native                 | hip osteoarthritis                                                                  | primary THA                                                                                         | -                                                                                                                         | -                                      | native                             |
| control 5 | 69  | m   | native                 | hip osteoarthritis                                                                  | primary THA                                                                                         | -                                                                                                                         | -                                      | THA                                |
| control 6 | 78  | m   | native                 | hip osteoarthritis                                                                  | primary THA                                                                                         | -                                                                                                                         | -                                      | native                             |
| case 1    | 61  | w   | modular short stem THA | recurrent dislocation, radiolucent lines at the cup and the modular stem            | revision to a elliptic TMT cup with cemented PE inlay, non-modular stem and ceramic head            | primary modular short stem THA; cup revision to non-cemented TMT press-fit cup (3 years post-PI)                          | 11                                     | native                             |
| case 2    | 73  | m   | modular short stem THA | pseudotumor, metallosis                                                             | revision to modular TMT cup, PE inlay, ceramic head and non-modular stem; allogeneic bone grafting  | primary implantation of a THA; revision to modular short stem prosthesis after fracture of ceramic head (4 years post-PI) | 12                                     | THA                                |
| case 3    | 63  | w   | McMinn HRA implant     | pseudotumor, elevated systemic metal levels, metallosis, central acetabular defect  | revision to TMT cup, PE inlay, ceramic head and non-modular stem; acetabular augmentation           | primary HR implant                                                                                                        | 12                                     | native                             |
| case 4    | 78  | w   | McMinn HRA implant     | periprosthetic femoral fracture                                                     | revision to a modular TMT cup, PE inlay, ceramic head and non-modular stem                          | primary HR implant                                                                                                        | 11                                     | THA                                |
| case 5    | 78  | m   | McMinn HRA implant     | progressive pain, acetabular and femoral osteolysis, elevated systemic metal levels | revision to modular TMT cup, PE inlay, ceramic head and non-modular stem; allogeneic bone grafting. | primary HR implant                                                                                                        | 14                                     | THA                                |

|         |    |   |                     |                                                                            |                                                                                                                  |                                                                                                            |      |            |
|---------|----|---|---------------------|----------------------------------------------------------------------------|------------------------------------------------------------------------------------------------------------------|------------------------------------------------------------------------------------------------------------|------|------------|
| case 6  | 60 | m | McMinn HRA implant  | progressive pain, acetabular and femoral osteolysis                        | revision to modular TMT cup, PE inlay, ceramic head and non-modular stem; allogeneic bone grafting               | primary HR implant                                                                                         | 12   | HR implant |
| case 7  | 76 | m | MoM THA             | pseudotumor, elevated systemic metal levels, osteolysis                    | revision to elliptic TMT cup with cemented PE inlay, non-modular stem and ceramic head; allogeneic bone grafting | primary HR implant; revision to MoM THA due to femoral neck fracture (first year post-PI)                  | 8    | HR implant |
| case 8  | 69 | w | MoM THA             | progressive pain, stem loosening, acetabular osteolysis                    | revision to elliptic TMT cup, PE inlay, non-modular stem and ceramic head                                        | primary MoM THA                                                                                            | 11   | native     |
| case 9  | 61 | w | MoM THA             | pain, osteolyses, elevated metal levels                                    | revision of the articulating components to ceramic head and PE inlay, allogeneic bone grafting                   | primary MoM THA                                                                                            | 19   | THA        |
| case 10 | 46 | m | MoP THA             | femoral osteolysis, suspicion of PJI                                       | revision to modular TMT cup, PE inlay, ceramic head and non-modular stem                                         | primary THA; cup revision due to cup fracture (5 years post-PI)                                            | 12   | native     |
| case 11 | 58 | w | multi-component THA | TMT cup loosening and dislocation, luxation                                | revision to elliptic TMT cup, PE inlay, CoCrMo head; stem and TMT wedge preserved                                | primary THA due to osteoarthritis secondary to dysplasia; multiple revisions (6, 14, 22, 25 years post-PI) | 9    | native     |
| case 12 | 62 | w | multi-component THA | cup loosening, acetabular osteolysis                                       | revision to TMT cup with cup cage construct, PE inlay, ceramic head; stem preserved                              | primary THA, cup revision(s) (n.a. years post-PI)                                                          | n.a. | THA        |
| case 13 | 75 | m | TKA                 | progressive pain, PE inlay abraded, synovialitis, pseudotumor              | cemented hinge TKA                                                                                               | primary TKA                                                                                                | 16   | native     |
| case 14 | 71 | m | TKA                 | PE inlay abraded, TKA loosening, metallosis, femoral and tibial osteolysis | cemented hinge TKA                                                                                               | primary TKA                                                                                                | 19   | native     |

Abbreviations: CoCrMo, cobalt-chromium-molybdenum alloy; HR, hip resurfacing; MoM, metal-on-metal; MoP, metal-on-polyethylene; n.a.; information not available from clinical records; PE, polyethylene; THA, total hip arthroplasty; TKA, total knee arthroplasty; TMT, trabecular metal technology

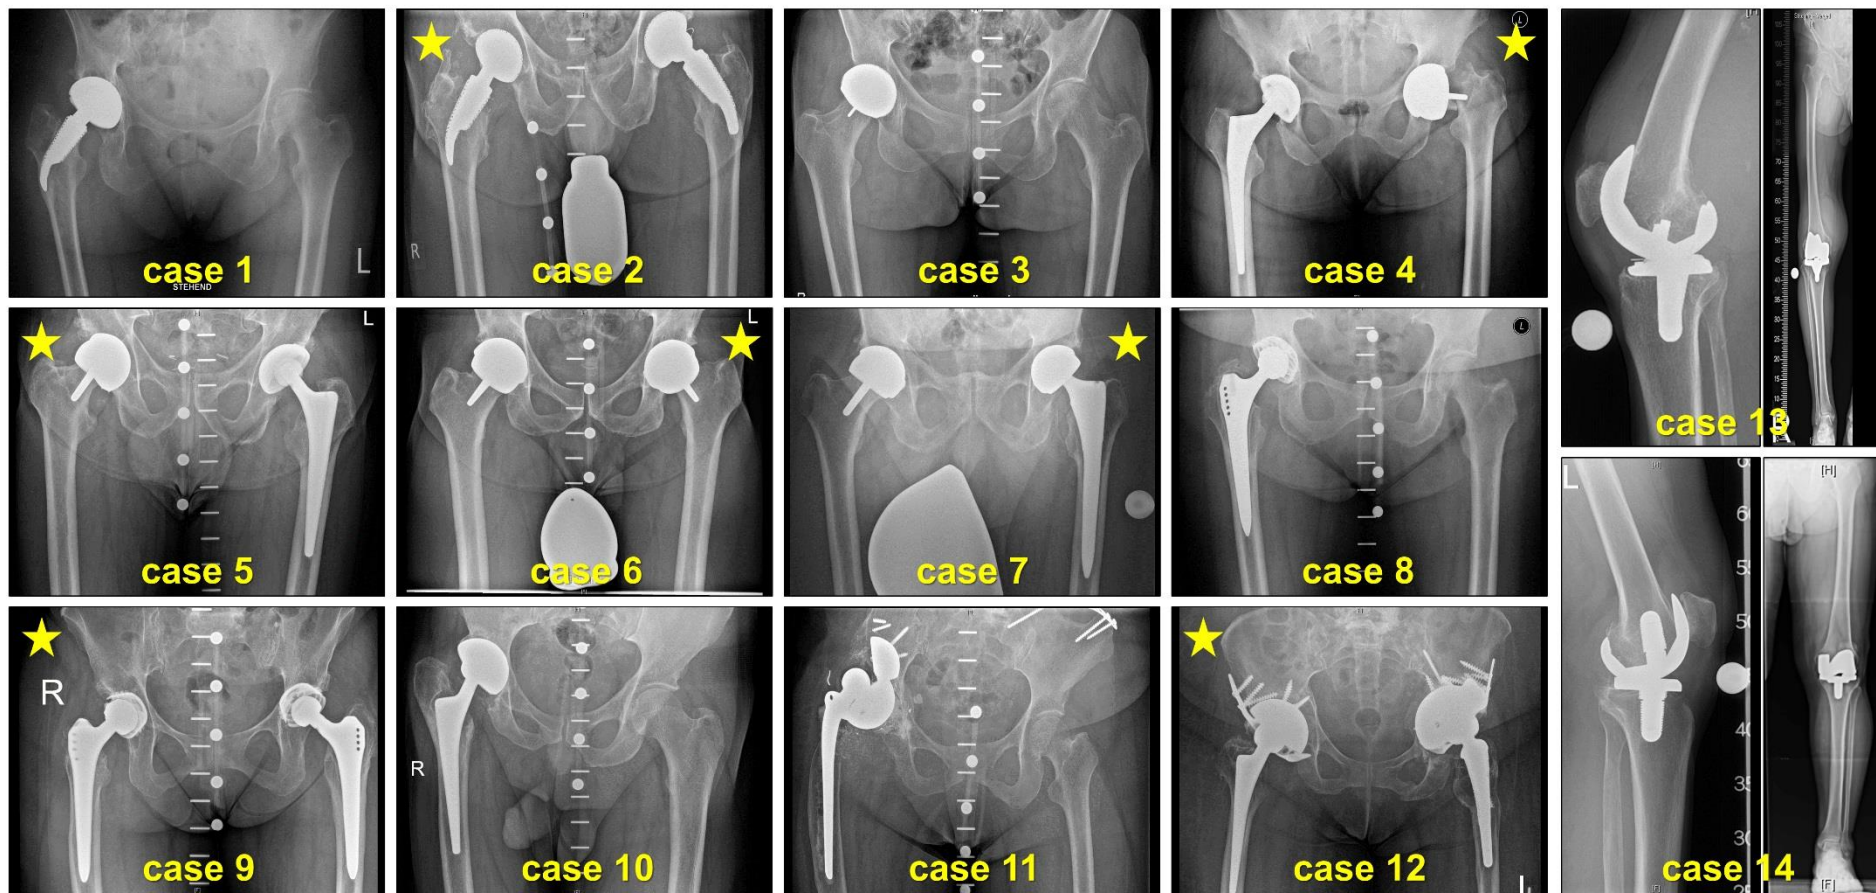

**Figure S1.** Pre-revisional radiographs of all analyzed cases. In cases of bilateral implants at the time of revision, the yellow asterisk labels the side of the focus implant, i.e. the side of intraoperative surgical sampling.

**Table S2.** Systemic and local metal levels.

| sample ID            | serum [ $\mu\text{g l}^{-1}$ ] |                    | synovial fluid [ $\mu\text{g l}^{-1}$ ] |        |       |      |       |       |      |       |       |        |       |
|----------------------|--------------------------------|--------------------|-----------------------------------------|--------|-------|------|-------|-------|------|-------|-------|--------|-------|
|                      | Co                             | Cr                 | Co                                      | Cr     | Ti    | Al   | V     | Mn    | Ni   | Zr    | Nb    | Mo     | Ta    |
| case 1               | n.a.                           | 0.7                | 7.1                                     | 6.4    | 3.2   | < 23 | < 0.2 | 2.12  | < 6  | 0.10  | < 0.1 | 0.73   | < 0.1 |
| case 2               | 47.0                           | 15.2               | 821                                     | 659    | 3.5   | 11.3 | 0.42  | 16.7  | 18.7 | < 0.2 | < 0.1 | 43.1   | < 0.1 |
| case 3               | 171                            | 60.3               | 6,911                                   | 12,298 | 3.2   | < 23 | 2.09  | 42.3  | 13.0 | 0.49  | 2.19  | 367    | 0.19  |
| case 4               | n.a.                           | n.a.               | n.a.                                    | n.a.   | n.a.  | n.a. | n.a.  | n.a.  | n.a. | n.a.  | n.a.  | n.a.   | n.a.  |
| case 5               | 37.3                           | 34.8               | 3,028                                   | 6,967  | 3.9   | < 23 | 0.52  | 32.1  | 9.22 | 0.18  | 0.27  | 301    | < 0.1 |
| case 6               | 2.33 <sup>a)</sup>             | 2.06 <sup>a)</sup> | 137                                     | 194    | 2.8   | < 23 | < 0.2 | 9.62  | 8.93 | 0.39  | < 0.1 | 8.93   | < 0.1 |
| case 7               | 16.5                           | 3.0                | 401                                     | 79.4   | 5.5   | < 23 | 0.21  | 8.49  | < 6  | < 0.1 | < 0.1 | 8.68   | < 0.1 |
| case 8               | n.a.                           | 1.2                | 19.3                                    | 33.8   | 7.4   | < 23 | < 0.2 | 13.3  | 36.4 | 0.71  | < 0.1 | 2.85   | < 0.1 |
| case 9               | n.a.                           | 4.6 <sup>b)</sup>  | 3,487                                   | 1,917  | 12.6  | < 23 | 1.28  | 26.6  | 8.11 | < 0.1 | 1.96  | 154    | < 0.1 |
| case 10              | n.a.                           | n.a.               | n.a.                                    | n.a.   | n.a.  | n.a. | n.a.  | n.a.  | n.a. | n.a.  | n.a.  | n.a.   | n.a.  |
| case 11              | < 1                            | 0.60               | 34.1                                    | 22.3   | 1,316 | 77.5 | 64.0  | 1.20  | 0.97 | 3,448 | 1.14  | 4.00   | 6,415 |
| case 12              | n.a.                           | n.a.               | n.a.                                    | n.a.   | n.a.  | n.a. | n.a.  | n.a.  | n.a. | n.a.  | n.a.  | n.a.   | n.a.  |
| case 13              | n.a.                           | n.a.               | 12.8                                    | 28.6   | 5.0   | < 23 | < 0.2 | 2.32  | < 6  | 0.20  | < 0.1 | 1.85   | < 0.1 |
| case 14              | n.a.                           | n.a.               | n.a.                                    | n.a.   | n.a.  | n.a. | n.a.  | n.a.  | n.a. | n.a.  | n.a.  | n.a.   | n.a.  |
| ref serum            | < 0.9                          | < 0.5              | -                                       | -      | -     | -    | -     | -     | -    | -     | -     | -      | -     |
| ref SF <sup>c)</sup> | -                              | -                  | < 0.06                                  | < 0.6  | < 5   | < 23 | < 0.2 | < 1.3 | < 2  | < 0.2 | < 0.1 | < 1.75 | < 0.1 |

Abbreviation: n.a., not available; SF, synovial fluid; ref, reference value

<sup>a)</sup>metal quantification in whole blood; <sup>b)</sup>metal quantification one year prior to local sample harvesting in the course of a contralateral revision surgery; <sup>c)</sup>metal quantification in three independent samples of native synovial fluid

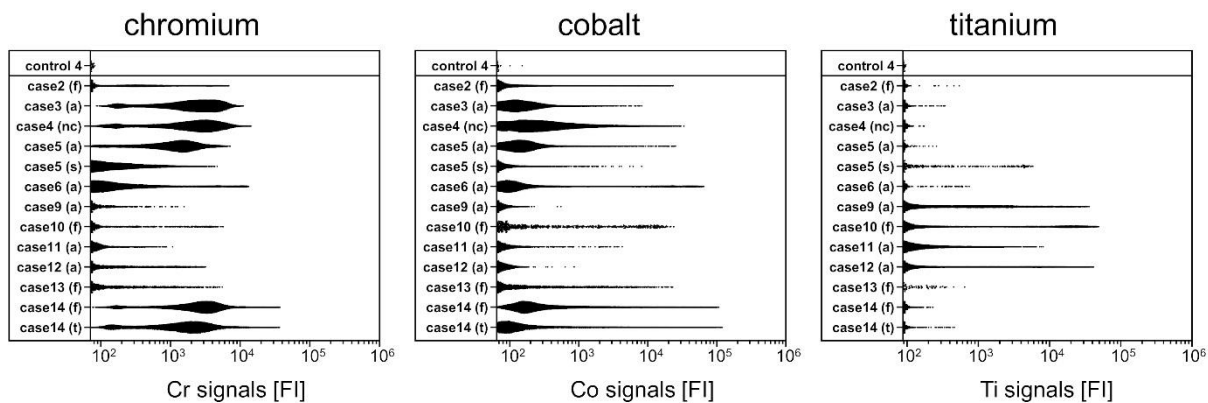

**Figure S2.** Distributions of the quantitative data points for cobalt, chromium and titanium of all individual nano-XRF maps. Depicted are all data points from maps with 60 nm spatial resolution which are greater than the metal specific 99.9% quantile of the overall data points obtained from the control sample ( $Q_{0.999}$  cobalt [FI], 64.50;  $Q_{0.999}$  chromium [FI], 70.74;  $Q_{0.999}$  titanium [FI], 87.16). Abbreviations: FI, fluorescence intensity



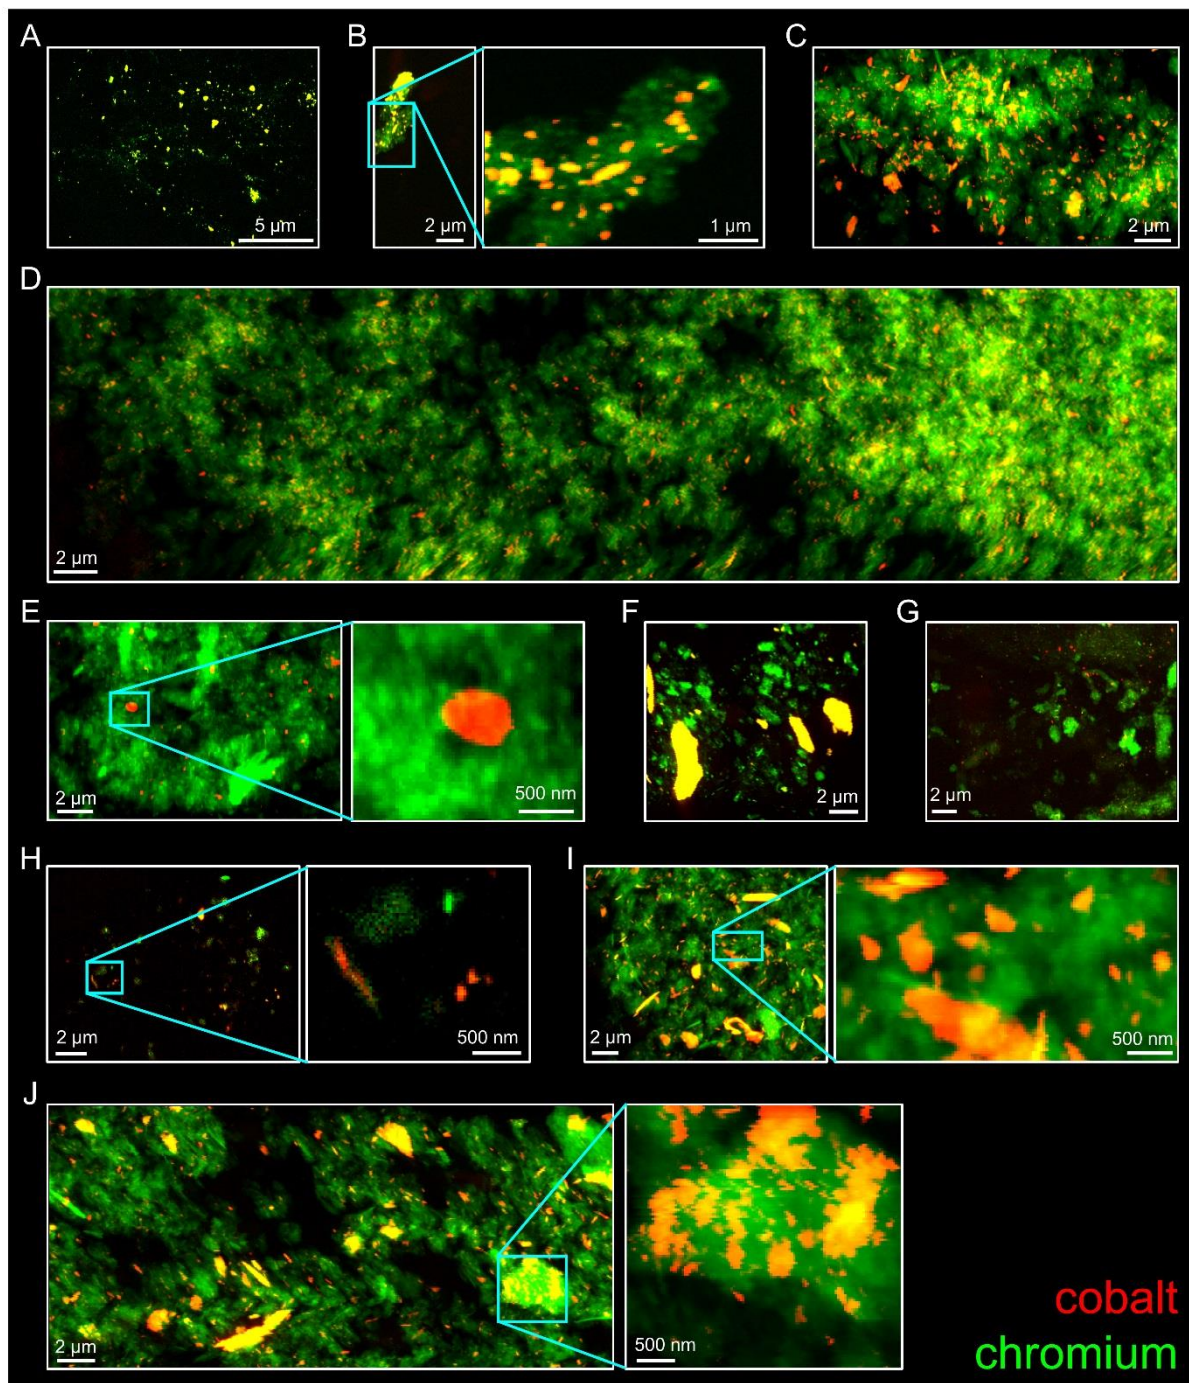

**Figure S3.** XRF-scans at 60 nm and 30 nm resolution of peri-implant bone marrow specimens show substantial exposure to CoCr containing micron-, submicron- and nanoparticles. Cobalt is exclusively co-localized with chromium and present in the particulate state. Chromium is also present without co-localized cobalt in characteristic dissolution clouds. Depicted are qualitative images of the XRF-scans from various implant types: (A, B) modular stem total hip arthroplasty implant, (C-G) hip resurfacing implants, (H) revision total hip arthroplasty implant and (I, J) total knee arthroplasty implant.



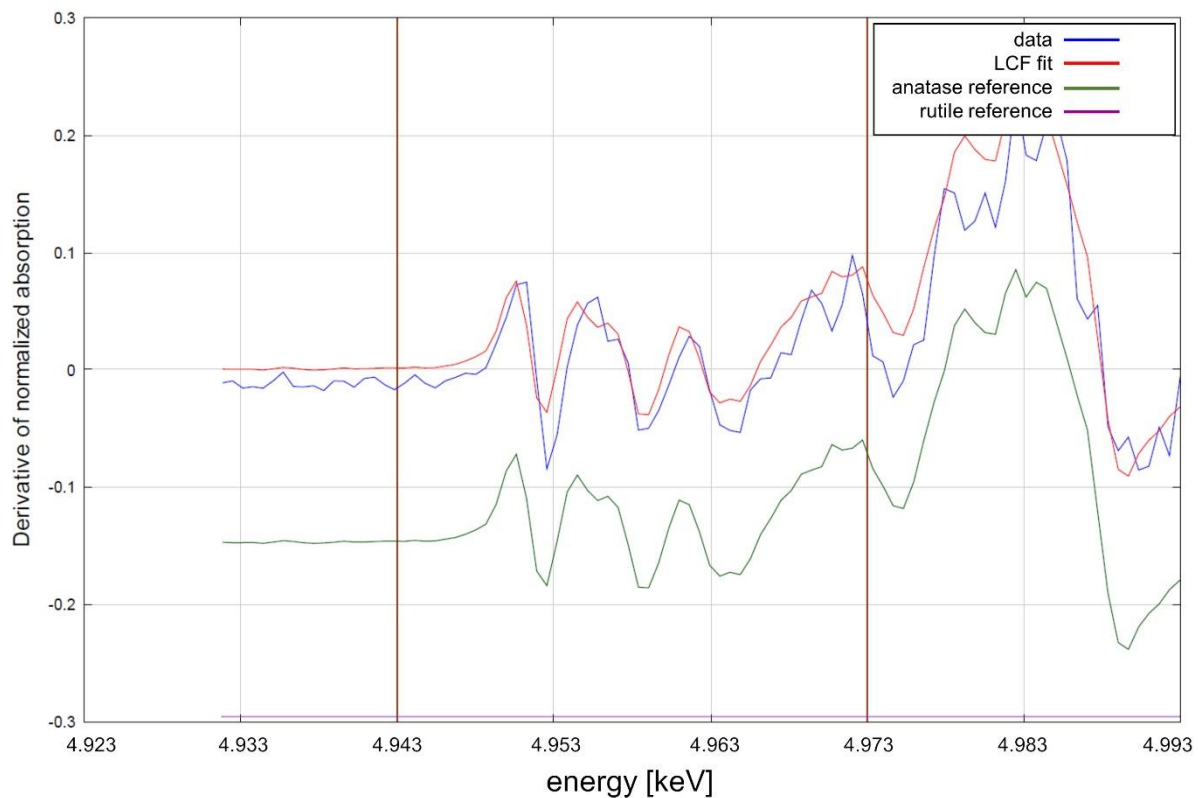

**Figure S4.** Linear combination fitting of X-ray absorption near edge structure analyses indicate predominate titanium dioxide in the anatase crystal phase of the analyzed Ti-containing particle. Plotted are the first derivatives of the absorption values. Sum spectrum of  $n = 5$  analyzed particles (data) in comparison to reference spectra of rutile and anatase. The linear combination fitting reveals that no contribution of rutile is required for the best linear combination fit.

**Table S3.** Detailed information on chemicals, buffers and equipment used in the course of sample harvesting and preparation.

| Chemicals, buffers & equipment            | Trade name                                                                          | Manufacturer                 |
|-------------------------------------------|-------------------------------------------------------------------------------------|------------------------------|
| 4% Paraformaldehyde solution              | (prepared from) 16% Paraformaldehyde aqueous solution                               | Electron Microscopy Sciences |
| Phosphate-buffered saline                 | Dulbecco's Phosphate-Buffered Saline                                                | Gibco                        |
| Embedding cassettes                       | Tissue-Tek Mega-Cassettes                                                           | Sakura                       |
| Ethanol of various concentrations         | (prepared from) Ethanol $\geq$ 99.5 %                                               | Carl Roth                    |
| Xylene                                    | Xylenes, Histological Grade                                                         | Fisher scientific            |
| Methyl methacrylate                       | Technovit 9100 liquid                                                               | Kulzer                       |
| Benzoyl peroxide / dicyclohexyl phthalate | Technovit 9100 hardener 1                                                           | Kulzer                       |
| Poly(methyl methacrylate)                 | Technovit 9100 powder                                                               | Kulzer                       |
| 3,5,N,N-tetramethylaniline                | Technovit 9100 hardener 2                                                           | Kulzer                       |
| 1-Decanethiol                             | Technovit 9100 regulator                                                            | Kulzer                       |
| Rotary microtome                          | Rotary microtome RM 2255                                                            | Leica                        |
| Tungsten carbide blade                    | TC knife profile d, 16 cm, 40, 50, 60 degrees                                       | Leica                        |
| Ultralene microfoil                       | Pre-Cut Circular Window Film                                                        | SPEX SamplePrep              |
| Polyethylene foil                         | Kisol foil                                                                          | Kettenbach                   |
| 2-Methoxyethyl acetate                    | 2-Methoxyethyl acetate for synthesis                                                | Merck Millipore              |
| DMEM                                      | Dulbecco's modified Eagle's medium - low glucose                                    | Sigma-Aldrich                |
| Fetal calf serum                          | FBS Superior                                                                        | Biochrom                     |
| L-alanyl-L-glutamine                      | GlutaMAX                                                                            | Gibco                        |
| Penicillin / Streptomycin                 | Penicillin 10.000 U ml <sup>-1</sup> / Streptomycin 10.000 $\mu$ g ml <sup>-1</sup> | Biochrom                     |
| Histopaque, 1.077 g ml <sup>-1</sup>      | Histopaque®-1077                                                                    | Sigma-Aldrich                |
| Human serum albumin                       | ALBUNORM 20%                                                                        | Octapharma                   |
| RPMI 1640                                 | RPMI-1640 Medium with L-glutamine and sodium bicarbonate                            | Sigma-Aldrich                |
| Human AB serum                            | Serum from human male AB plasma                                                     | Sigma-Aldrich                |
| Nuclease                                  | Pierce Universal Nuclease for Cell Lysis                                            | Thermo Fisher                |
